# Supplementary material
Source: MDPI journal article supplement (https://www.mdpi.com/2673-8104/3/1/5)
Supplement: s1 [file s1]

**Supplementary File.** Participant Profile and Results Summary.

| Participant   | Gender | Age | Nationality | Family Responsibilities | Organization Sector            | Job Role                                 | Type of NPM Implemented | Observed WLB | Level of OCB | Has Thought About Leaving |
|---------------|--------|-----|-------------|-------------------------|--------------------------------|------------------------------------------|-------------------------|--------------|--------------|---------------------------|
| Participant 1 | Male   | 42  | UAE         | Yes                     | Family Development Foundation  | Customer Relationship Management Manager | Traditional             | Poor WLB     | Medium       | Yes                       |
| Participant 2 | Male   | 47  | UAE         | Yes                     | Economic Development           | Investment Manager                       | Traditional             | Poor WLB     | High         | Yes                       |
| Participant 3 | Male   | 48  | UAE         | Yes                     | Transport Management           | Operations Manager                       | Innovative              | Good WLB     | High         | No                        |
| Participant 4 | Male   | 44  | UAE         | Yes                     | Airport Management             | Operations Manager                       | Innovative              | Neutral WLB  | High         | Yes                       |
| Participant 5 | Male   | 50  | Expatriate  | Yes                     | Tourism                        | Customer Relationship Management Manager | Innovative              | Good WLB     | High         | No                        |
| Participant 6 | Male   | 40  | UAE         | Yes                     | Data Management & Statistics   | Operations Manager                       | Innovative              | Good WLB     | High         | No                        |
| Participant 7 | Male   | 43  | UAE         | Yes                     | Quality and Conformity Council | Customer Relationship Management Manager | Traditional             | Poor WLB     | High         | Yes                       |

|                |        |    |            |     |                       |                                          |             |          |        |     |
|----------------|--------|----|------------|-----|-----------------------|------------------------------------------|-------------|----------|--------|-----|
| Participant 8  | Male   | 40 | Expatriate | Yes | Waste Management      | Operations Manager                       | Traditional | Poor WLB | High   | Yes |
| Participant 9  | Male   | 41 | Expatriate | Yes | Exhibitions           | Events Management Manager                | Innovative  | Good WLB | High   | No  |
| Participant 10 | Male   | 36 | UAE        | Yes | Media Industry        | Operations Manager                       | Innovative  | Good WLB | Medium | Yes |
| Participant 11 | Male   | 35 | UAE        | Yes | Digital Authority     | Government Relations Manager             | Traditional | Poor WLB | Medium | Yes |
| Participant 12 | Male   | 43 | UAE        | Yes | Ports                 | Operations Manager                       | Innovative  | Good WLB | High   | No  |
| Participant 13 | Female | 40 | UAE        | Yes | Community Development | Customer Relationship Management Manager | Traditional | Poor WLB | High   | Yes |
| Participant 14 | Male   | 38 | Expatriate | Yes | Utilities             | Business Development Manager             | Innovative  | Good WLB | High   | No  |
| Participant 15 | Male   | 32 | UAE        | Yes | Fund for Development  | Human Resource Manager                   | Innovative  | Good WLB | High   | No  |
| Participant 16 | Male   | 37 | UAE        | Yes | Distribution Company  | Business Development Manager             | Innovative  | Good WLB | High   | No  |

|                |        |    |            |     |                         |                         |             |             |        |     |
|----------------|--------|----|------------|-----|-------------------------|-------------------------|-------------|-------------|--------|-----|
| Participant 17 | Male   | 37 | Expatriate | Yes | Fund                    | Quality Control Manager | Innovative  | Neutral WLB | Medium | Yes |
| Participant 18 | Female | 35 | UAE        | Yes | Entertainment           | Human Resource Manager  | Traditional | Poor WLB    | Low    | Yes |
| Participant 19 | Male   | 40 | UAE        | Yes | Distribution Company    | Operations Manager      | Innovative  | Good WLB    | High   | No  |
| Participant 20 | Female | 35 | UAE        | Yes | Health Services Company | Operations Manager      | Innovative  | Good WLB    | High   | No  |
| Participant 21 | Female | 44 | UAE        | Yes | Department of Health    | Department Manager      | Innovative  | Good WLB    | Medium | Yes |

Note: Traditional NPM = blue shading; Innovative NPM = green shading
